# Supplementary material for: Matrix stiffness influences response to chemo and targeted therapy in brain metastatic breast cancer cells
Source: Royal Society of Chemistry journal article supplement (doi:10.1039/d4bm00342j), 2024-01-01
Supplement: d4bm00342j1.pdf [file d4bm00342j1.pdf]

## Supplementary information

### **Matrix stiffness influences response to chemo and targeted therapy in brain metastatic breast cancer cells**

Venu Yakati<sup>1</sup>, Lalita A. Shevde<sup>2</sup>, and Shreyas S. Rao<sup>1\*</sup>

<sup>1</sup>Department of Chemical and Biological Engineering, The University of Alabama, Tuscaloosa, AL 35487, USA

<sup>2</sup>Department of Pathology, O'Neal Comprehensive Cancer Center, University of Alabama at Birmingham

Birmingham, AL 35233, USA

\*Corresponding Author.

Shreyas S. Rao, Ph.D.  
Department of Chemical and Biological Engineering  
The University of Alabama  
Tuscaloosa, AL, 35487-0203, USA  
Office: SEC 3453  
Phone: (205) 348-6564  
Fax: (205) 348-7558  
Email: [srao3@eng.ua.edu](mailto:srao3@eng.ua.edu)

## Supplementary Figures

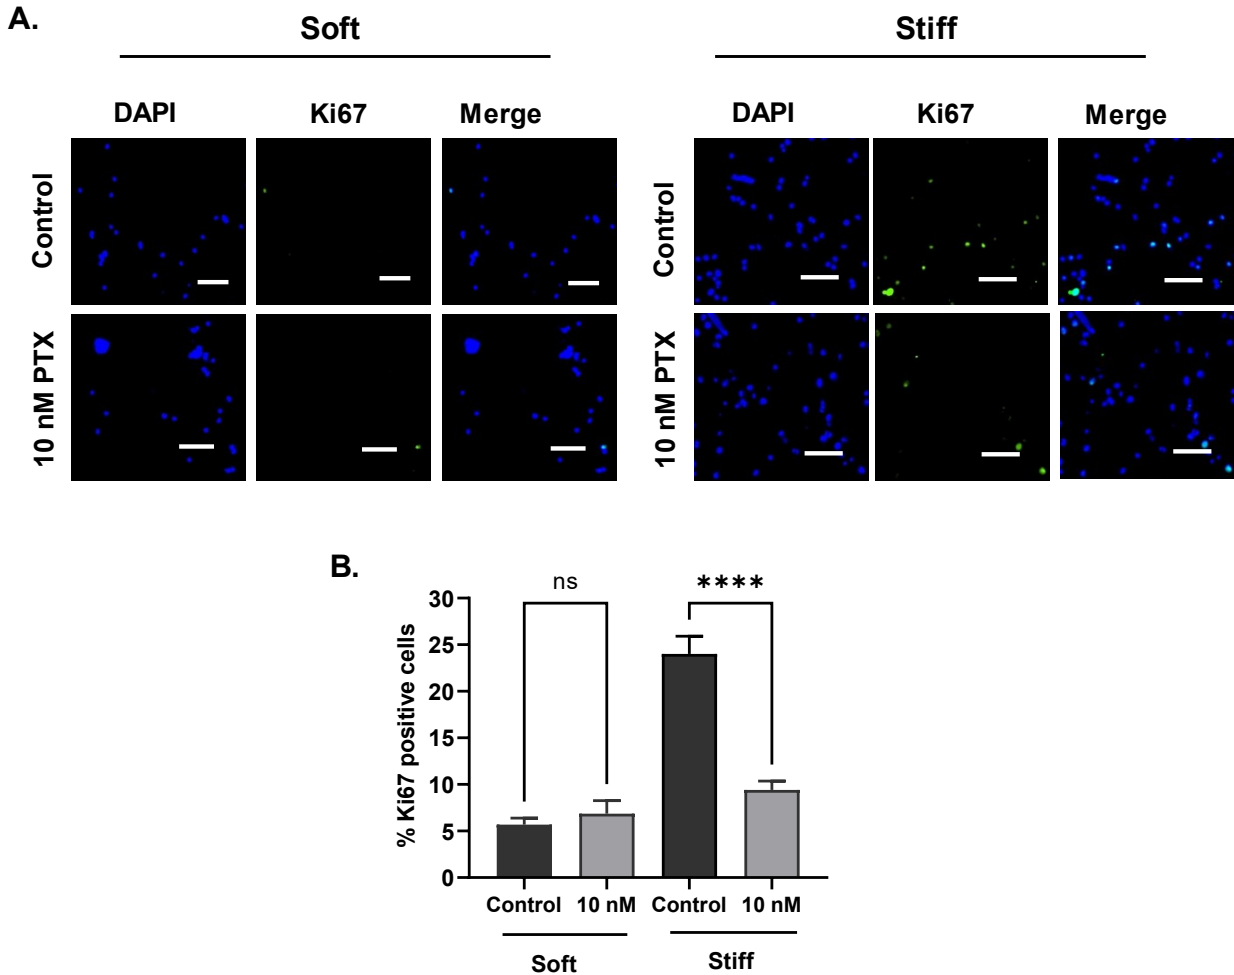

**Figure S1.** Percentage of Ki67 positive MDA-MB-231Br BMBC cells cultured on soft or stiff HA hydrogels treated with 10 nM PTX. (A) Fluorescence microscopic staining (blue: DAPI and green: Ki67) images of Ki67 positive MDA-MB-231Br cells cultured on soft or stiff HA hydrogels after 48 h without (control) or with 10 nM PTX treatment. (B) Quantification of percentage Ki67 positive MDA-MB-231Br cells. Scale bar = 100  $\mu$ m.  $N \geq 6$  hydrogels per condition. \*\*\*\* indicates  $p < 0.0001$  when compared to control. Data presented as mean  $\pm$  standard error.

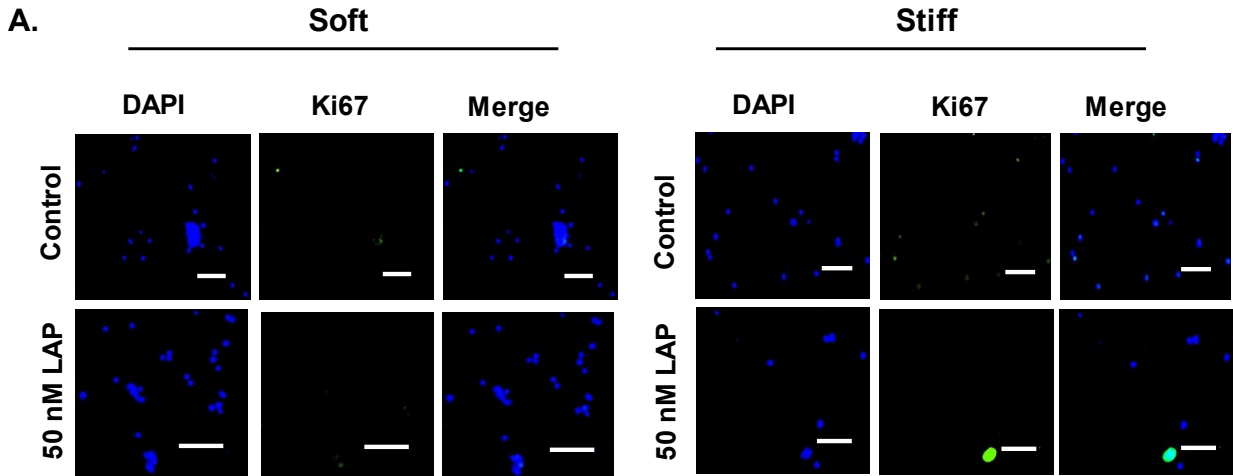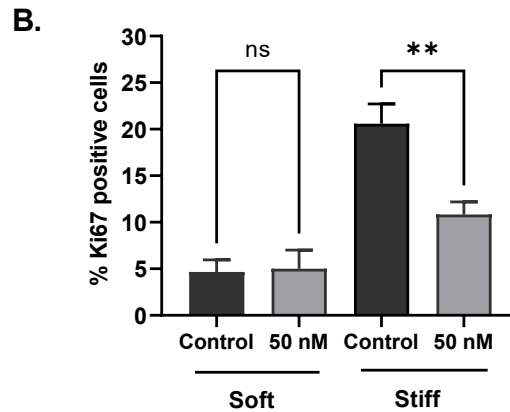

**Figure S2.** Percentage of Ki67 positive BT474Br3 BMBC cells cultured on soft or stiff HA hydrogels treated with 50 nM LAP. (A) Fluorescence microscopic staining (blue: DAPI and green: Ki67) images of Ki67 positive BT474Br3 cells cultured on soft or stiff HA hydrogels after 48 h without (control) or with 50 nM LAP treatment. (B) Quantification of percentage Ki67 positive BT474Br3 cells. Scale bar = 100  $\mu$ m.  $N \geq 6$  hydrogels per condition. \*\* indicates  $p < 0.01$  when compared to control. Data presented as mean  $\pm$  standard error.

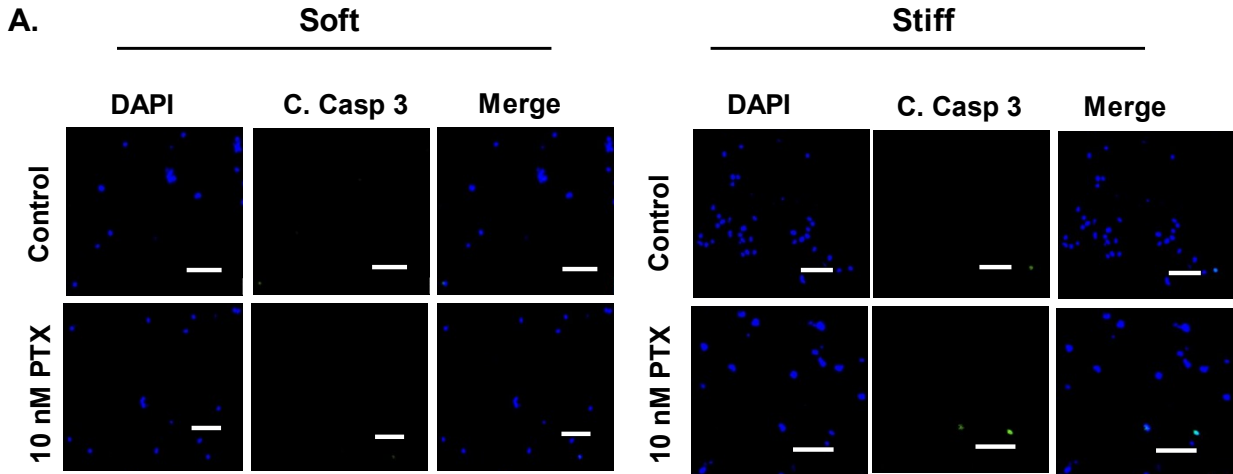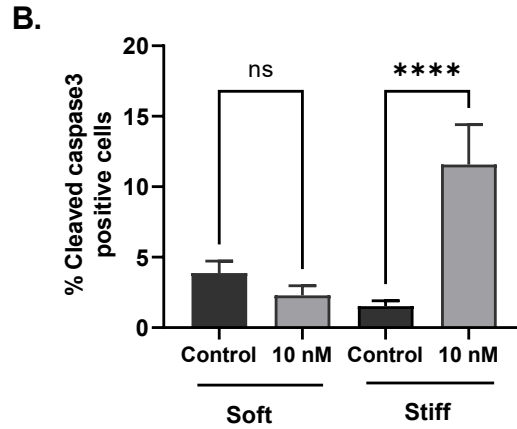

**Figure S3.** Percentage of Cleaved caspase 3 positive MDA-MB-231Br BMBC cells cultured on soft or stiff HA hydrogels treated with 10 nM PTX. (A) Fluorescence microscopic staining (blue: DAPI and green: Cleaved caspase 3) images of Cleaved caspase 3 positive MDA-MB-231Br cells cultured on soft or stiff HA hydrogels after 48 h without (control) or with 10 nM PTX treatment (B) Quantification of percentage Cleaved caspase 3 positive MDA-MB-231Br cells. Scale bar = 100  $\mu$ m.  $N \geq 6$  hydrogels per condition. \*\*\*\* indicates  $p < 0.0001$  when compared to control. Data presented as mean  $\pm$  standard error.

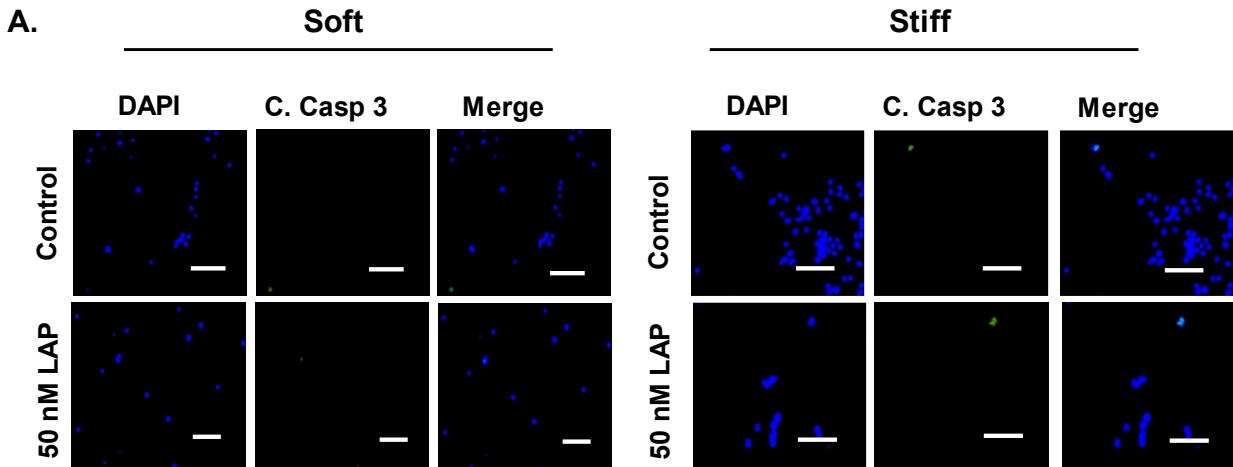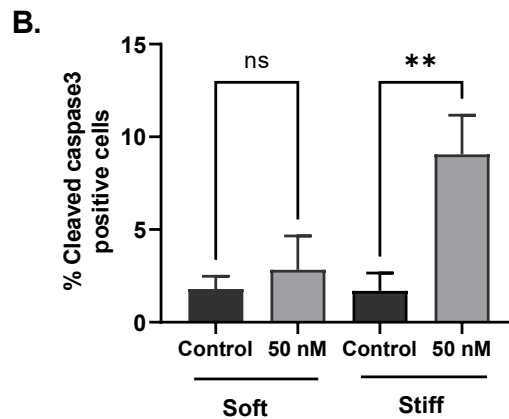

**Figure S4.** Percentage of Cleaved caspase 3 positive BT474Br3 BMBC cells cultured on soft or stiff HA hydrogels treated with 50 nM LAP. (A) Fluorescence microscopic staining (blue: DAPI and green: Cleaved caspase 3) images of Cleaved caspase 3 positive BT474Br3 cells cultured on soft or stiff HA hydrogels after 48 h without (control) or with 50 nM LAP treatment. (B) Quantification of percentage Cleaved caspase 3 positive BT474Br3 cells. Scale bar = 100  $\mu$ m.  $N \geq 6$  hydrogels per condition. \*\* indicates  $p < 0.01$  when compared to control. Data presented as mean  $\pm$  standard error.

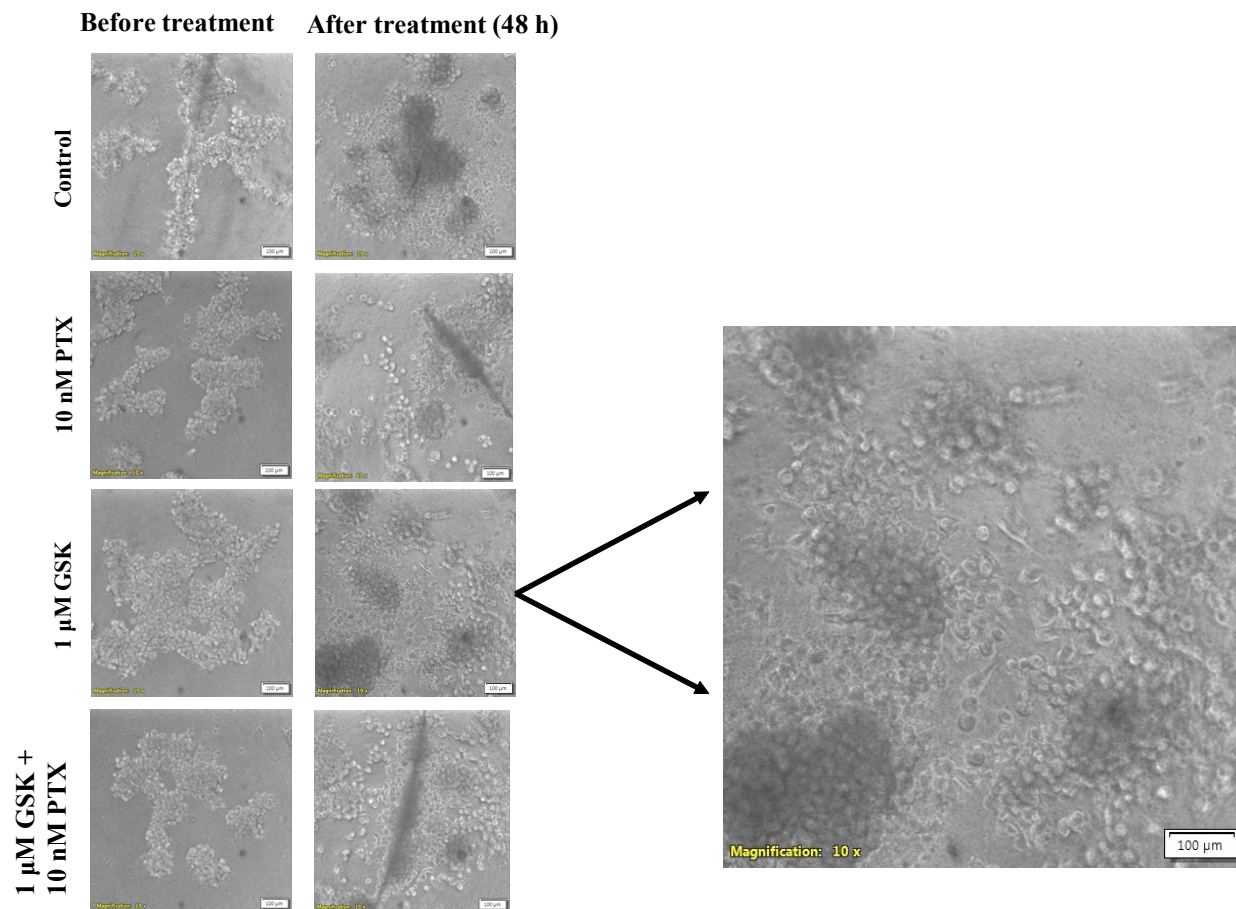

**Figure S5.** Morphology of MDA-MB-231Br BMBC cells cultured on soft HA hydrogel before (on day 2) and after treatment (day 4) in control (untreated), 10 nM PTX, 1  $\mu$ M GSK, and 10 nM PTX + 1  $\mu$ M GSK conditions.

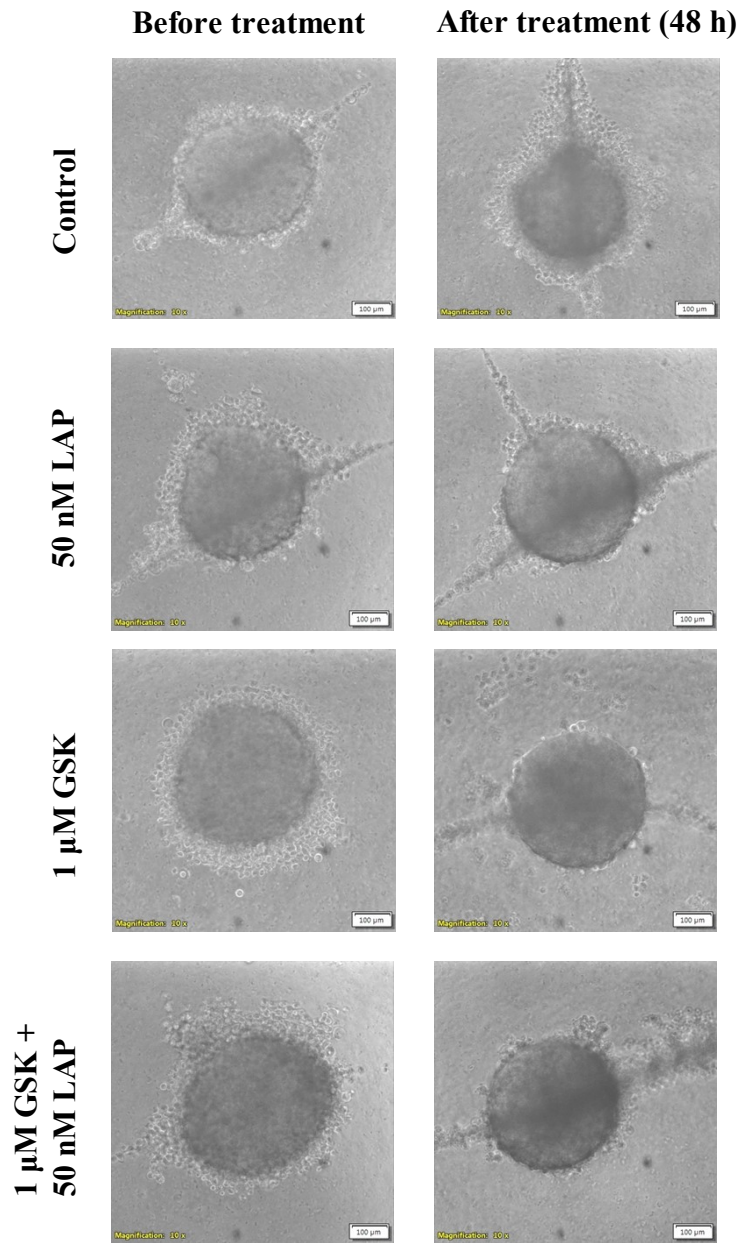

**Figure S6.** Morphology of BT474Br3 BMBC cells cultured on soft HA hydrogel before (on day 2) and after treatment (day 4) in control (untreated), 50 nM LAP, 1  $\mu$ M GSK and 50 nM LAP + 1  $\mu$ M GSK conditions.

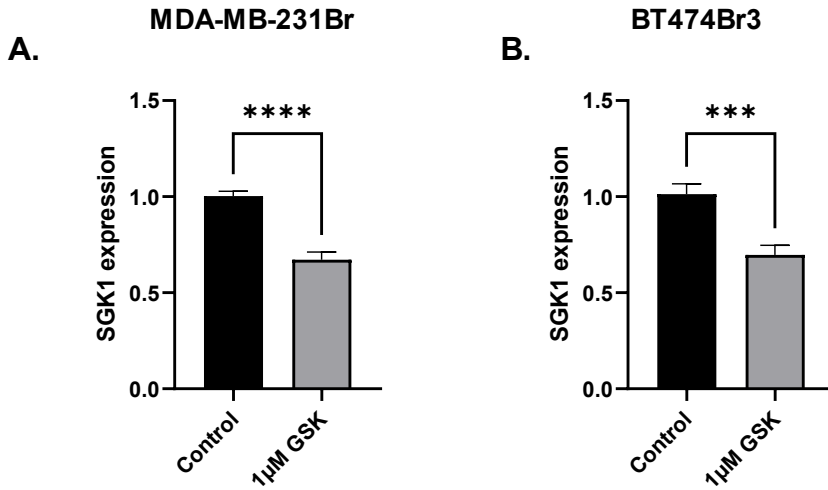

**Figure S7.** SGK1 gene expression in BMBC cells cultured on soft HA hydrogels with or without treatment. (A) SGK1 gene expression in MDA-MB-231Br cells cultured on soft HA hydrogels after 48 h without (control) or with 1  $\mu$ M GSK treatment. (B) SGK1 gene expression in BT474Br3 cells cultured on soft HA hydrogels after 48 h without (control) or with 1  $\mu$ M GSK treatment. The relative expression was normalized with control (of soft hydrogel).  $N \geq 6$  hydrogels per condition. \*\*\*indicates  $p < 0.001$  and \*\*\*\* indicates  $p < 0.0001$ . Data presented as mean  $\pm$  std error.



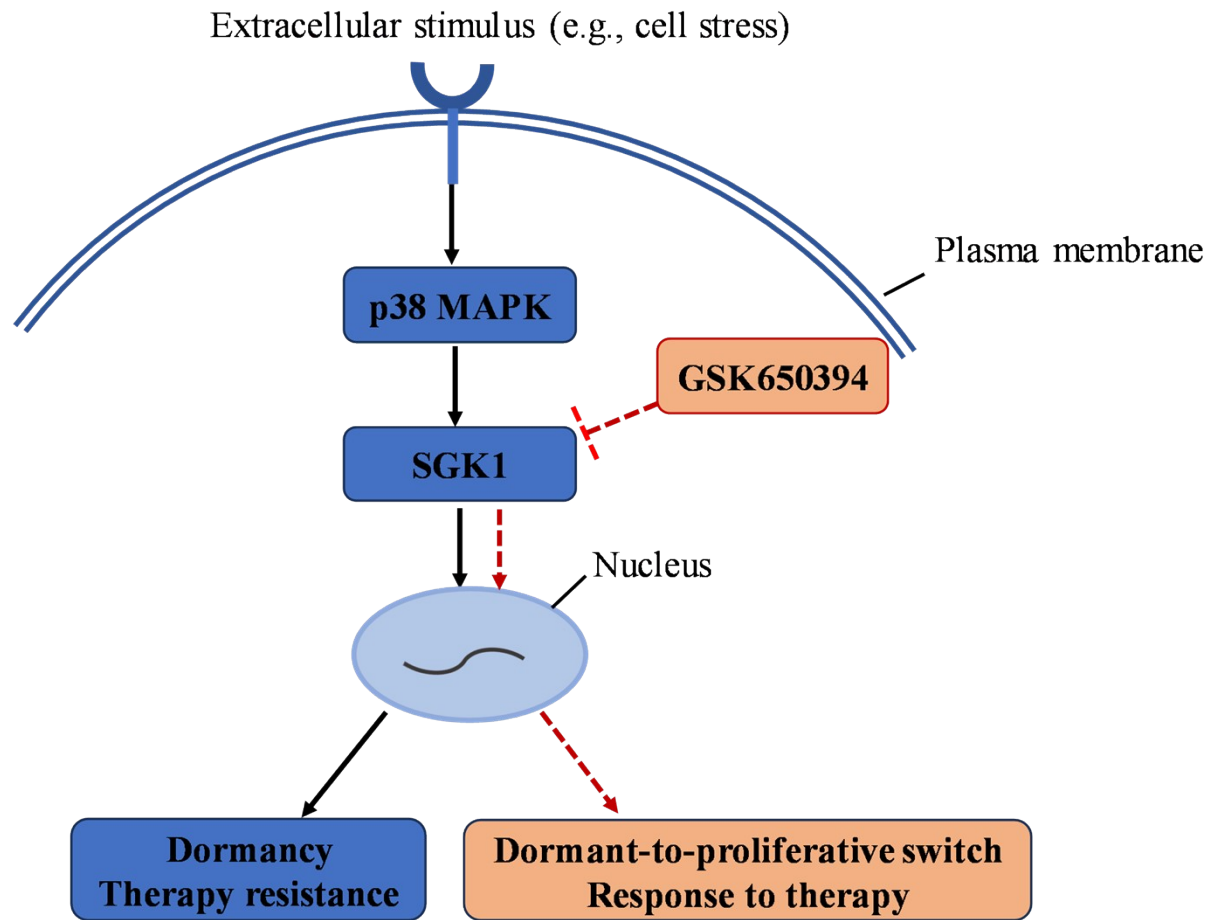

**Figure S8.** Schematic representation of p38 MAPK mediated SGK1 signaling pathway in dormancy associated chemoresistance. Inhibition of SGK1 using SGK inhibitor (GSK650394) resulted in a dormant-to-proliferative switch and response to therapy.
